# Supplementary material
Source: PubMed Central journal article supplement (PMC8174029)

Disclosure Purpose: 21-06383

## Summary of Interests

| Entity                                                   | Type  | Interest Held By                                                             |
|----------------------------------------------------------|-------|------------------------------------------------------------------------------|
| <a href="#">AstraZeneca</a>                              | Other | Self                                                                         |
| <i>Category:</i> Other<br><i>Additional Information:</i> |       | <i>Description:</i> scientific board on antiplatelet agents in minor strokes |
| <a href="#">Biogen</a>                                   | Other | Self                                                                         |
| <i>Category:</i> Other<br><i>Additional Information:</i> |       | <i>Description:</i> international steering committee CHARM trial             |
| <a href="#">Biogen</a>                                   | Other | Self                                                                         |
| <i>Category:</i> Other<br><i>Additional Information:</i> |       | <i>Description:</i> scientific board on cerebral amyloid angiopathy          |
| <a href="#">Boehringer Ingelheim</a>                     | Other | Self                                                                         |
| <i>Category:</i> Other<br><i>Additional Information:</i> |       | <i>Description:</i> speaker fees                                             |
| <a href="#">Bristol-Myers Squibb</a>                     | Other | Self                                                                         |
| <i>Category:</i> Other<br><i>Additional Information:</i> |       | <i>Description:</i> international steering committee Axiomatic trial         |

## Additional Questions:

- Are there other relationships or activities that readers could perceive to have influenced, or that give the appearance of potentially influencing, what you wrote in the submitted work?**  
No.
- What is the manuscript title?**  
PF4 Immunoassays in Vaccine-Induced Thrombotic Thrombocytopenia
- Are you the corresponding author?**  
No.

## Certification

I certify that the information provided in this disclosure is complete and accurate.

**Disclosure Purpose:** 21-06383

## Summary of Interests

I do not have any interests to disclose at this time.

## Additional Questions:

- Are there other relationships or activities that readers could perceive to have influenced, or that give the appearance of potentially influencing, what you wrote in the submitted work?**  
No.
- What is the manuscript title?**  
Impact of PF4 Immunoassays in Vaccine-Induced Thrombotic Thrombocytopenia
- Are you the corresponding author?**  
No.

## Certification

I certify that the information provided in this disclosure is complete and accurate.

**Disclosure Purpose:** 21-06383

### Summary of Interests

I do not have any interests to disclose at this time.

### Additional Questions:

- Are there other relationships or activities that readers could perceive to have influenced, or that give the appearance of potentially influencing, what you wrote in the submitted work?**  
No.
- What is the manuscript title?**  
PF4 Immunoassays in Vaccine Induced Thrombotic Thrombocytopenia
- Are you the corresponding author?**  
No.

### Certification

I certify that the information provided in this disclosure is complete and accurate.

**Disclosure Purpose:** 21-06383

### Summary of Interests

I do not have any interests to disclose at this time.

### Additional Questions:

- Are there other relationships or activities that readers could perceive to have influenced, or that give the appearance of potentially influencing, what you wrote in the submitted work?**  
No.
- What is the manuscript title?**  
PF4 Immunoassays in Vaccine-Induced Thrombotic Thrombocytopenia
- Are you the corresponding author?**  
No.

### Certification

I certify that the information provided in this disclosure is complete and accurate.

**Disclosure Purpose:** 21-06383

## Summary of Interests

I do not have any interests to disclose at this time.

## Additional Questions:

1. **Are there other relationships or activities that readers could perceive to have influenced, or that give the appearance of potentially influencing, what you wrote in the submitted work?**

No.

2. **What is the manuscript title?**

Impact of PF4 immunoassays in vaccine-induced thrombotic thrombocytopenia

3. **Are you the corresponding author?**

Yes.

- a. **Please list the other authors' names here.**

Caroline Vayne, Jérôme Rollin, Claire Pouplard, Hubert Galinat, Olivier Huet, Vincent Mémier, Thomas Geeraerts, Raphael Marlu, Gilles Pernod, Guillaume Mourey, Alexandra Fournel, Charlotte Cordonnier, Sophie Susen

## Certification

I certify that the information provided in this disclosure is complete and accurate.

**Disclosure Purpose:** 21-06383

Summary of Interests

I do not have any interests to disclose at this time.

Additional Questions:

- 1. **Are there other relationships or activities that readers could perceive to have influenced, or that give the appearance of potentially influencing, what you wrote in the submitted work?**  
No.
- 2. **What is the manuscript title?**  
PF4 Immunoassays in Vaccine-Induced Thrombotic Thrombocytopenia
- 3. **Are you the corresponding author?**  
No.

Certification

I certify that the information provided in this disclosure is complete and accurate.

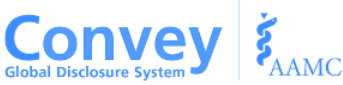

**Disclosure Purpose:** 21-06383

Summary of Interests

I do not have any interests to disclose at this time.

Additional Questions:

- 1. **Are there other relationships or activities that readers could perceive to have influenced, or that give the appearance of potentially influencing, what you wrote in the submitted work?**  
No.
- 2. **What is the manuscript title?**  
PF4 Immunoassays in Vaccine-Induced Thrombotic Thrombocytopenia
- 3. **Are you the corresponding author?**  
No.

Certification

I certify that the information provided in this disclosure is complete and accurate.



**Disclosure Purpose:** 21-06383

### Summary of Interests

I do not have any interests to disclose at this time.

### Additional Questions:

- Are there other relationships or activities that readers could perceive to have influenced, or that give the appearance of potentially influencing, what you wrote in the submitted work?**  
No.
- What is the manuscript title?**  
PF4 Immunoassays in Vaccine-Induced Thrombotic Thrombocytopenia
- Are you the corresponding author?**  
No.

### Certification

I certify that the information provided in this disclosure is complete and accurate.



**Disclosure Purpose:** 21-06383

### Summary of Interests

I do not have any interests to disclose at this time.

### Additional Questions:

- Are there other relationships or activities that readers could perceive to have influenced, or that give the appearance of potentially influencing, what you wrote in the submitted work?**  
No.
- What is the manuscript title?**  
PF4 Immunoassays in Vaccine-Induced Thrombotic Thrombocytopenia
- Are you the corresponding author?**  
No.

### Certification

I certify that the information provided in this disclosure is complete and accurate.

**Disclosure Purpose:** 21-06383

Summary of Interests

I do not have any interests to disclose at this time.

Additional Questions:

- 1. **Are there other relationships or activities that readers could perceive to have influenced, or that give the appearance of potentially influencing, what you wrote in the submitted work?**  
No.
- 2. **What is the manuscript title?**  
PF4 Immunoassays in Vaccine-Induced Thrombotic Thrombocytopenia
- 3. **Are you the corresponding author?**  
No.

Certification

I certify that the information provided in this disclosure is complete and accurate.



**Disclosure Purpose:** 21-06383

### Summary of Interests

I do not have any interests to disclose at this time.

### Additional Questions:

- Are there other relationships or activities that readers could perceive to have influenced, or that give the appearance of potentially influencing, what you wrote in the submitted work?**  
No.
- What is the manuscript title?**  
PF4 immunoassays in vaccine induced thrombotic thrombocytopenia
- Are you the corresponding author?**  
No.

### Certification

I certify that the information provided in this disclosure is complete and accurate.

**Disclosure Purpose:** 21-06383

## Summary of Interests

I do not have any interests to disclose at this time.

## Additional Questions:

- Are there other relationships or activities that readers could perceive to have influenced, or that give the appearance of potentially influencing, what you wrote in the submitted work?**  
No.
- What is the manuscript title?**  
PF4 Immunoassays in Vaccine-Induced Thrombotic Thrombocytopenia
- Are you the corresponding author?**  
No.

## Certification

I certify that the information provided in this disclosure is complete and accurate.

**Disclosure Purpose:** 21-06383

**Summary of Interests**

I do not have any interests to disclose at this time.

**Additional Questions:**

- 1. **Are there other relationships or activities that readers could perceive to have influenced, or that give the appearance of potentially influencing, what you wrote in the submitted work?**  
No.
- 2. **What is the manuscript title?**  
PF4 Immunoassays in Vaccine-Induced Thrombotic Thrombocytopenia
- 3. **Are you the corresponding author?**  
No.

**Certification**

I certify that the information provided in this disclosure is complete and accurate.

**Disclosure Purpose:** 21-06383

Summary of Interests

I do not have any interests to disclose at this time.

Additional Questions:

- 1. **Are there other relationships or activities that readers could perceive to have influenced, or that give the appearance of potentially influencing, what you wrote in the submitted work?**  
No.
- 2. **What is the manuscript title?**  
Impact of PF4 immunoassays in vaccine-induced thrombotic thrombocytopenia
- 3. **Are you the corresponding author?**  
No.

Certification

I certify that the information provided in this disclosure is complete and accurate.

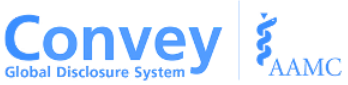

Supplement: NEJMc2106383_disclosures.pdf [file NEJMc2106383_disclosures.pdf]
