# Supplementary material
Source: PubMed Central journal article supplement (PMC8174029)
Supplement: NEJMc2106383_appendix.pdf [file NEJMc2106383_appendix.pdf]

## Supplementary Appendix

This appendix has been provided by the authors to give readers additional information about their work.

Supplement to: Vayne C, Rollin J, Gruel Y, et al. PF4 immunoassays in vaccine-induced thrombotic thrombocytopenia. *N Engl J Med*. DOI: [10.1056/NEJMc2106383](https://doi.org/10.1056/NEJMc2106383)

## Supplemental Appendix

### Supplementary Table S1

p2

Clinical and biological features of patients with suspected VITT

| Patient                                          | #1 (▲)    | #2 (●)    | #3 (□)    | #4 (△)   | #5 (◆)               | #6 (○)    | #7 (◇)   | #8 (✱)    | #9 (■)                 |
|--------------------------------------------------|-----------|-----------|-----------|----------|----------------------|-----------|----------|-----------|------------------------|
| Age (years)                                      | 43        | 69        | 38        | 24       | 73                   | 23        | 63       | 21        | 60                     |
| Gender (M/F)                                     | F         | F         | F         | F        | F                    | M         | M        | F         | F                      |
| <b>Thrombosis (Yes/No)</b>                       |           |           |           |          |                      |           |          |           |                        |
| <b>CVT</b>                                       | Yes       | Yes       | Yes       | Yes      | No                   | Yes       | No       | Yes       | ?                      |
| <b>Splanchnic VT</b>                             | No        | Yes       | Yes       | Yes      | No                   | No        | No       | Yes       | Yes                    |
| <b>Other thrombosis</b>                          | No        | No        | No        | No       | Ischemic stroke +DVT | No        | No       | DVT + PE  | PE + aortic thrombosis |
| Symptoms onset (days)                            | 10        | 9         | 14        | 18       | 10                   | 13        | 14       | 9         | 9                      |
| Platelet count (nadir, /mm <sup>3</sup> )        | 29,000    | 34,000    | 35,000    | 303,000  | 22,000               | 25,000    | 13,000   | 61,000    | 9,000                  |
| D-dimers peak (µg/ml)                            | >20       | >4        | >4        | 4        | >20                  | >20       | ND       | ND        | 105                    |
| Fibrinogen nadir (mg/dl)                         | 179       | 200       | 80        | 380      | 45                   | 150       | 334      | 200       | 60                     |
| <b>Rapid immunoassay for anti-PF4 antibodies</b> |           |           |           |          |                      |           |          |           |                        |
| <i>STic Expert® HIT</i>                          | Neg       | Neg       | Neg       | Neg      | Neg                  | Neg       | Neg      | Neg       | Neg                    |
| <i>ID-PaGIA® H/PF4</i>                           | ND        | ND        | ND        | ND       | Neg                  | Neg       | Neg      | Pos/Neg   | ND                     |
| <i>HemosIL AcuStar® HIT-IgG</i>                  | Neg       | Neg       | Neg       | Neg      | Neg                  | Neg       | Neg      | Neg       | Neg                    |
| <i>HemosIL® HIT-Ab</i>                           | ND        | Neg       | Neg       | ND       | ND                   | ND        | ND       | ND        | ND                     |
| PVS/PF4 Elisa (OD)                               | 1.90      | 1.97      | 1.55      | 0.24     | 1.44                 | 1.52      | 0.02     | 0.74      | 2.8                    |
| Standard SRA (Pos/Neg)                           | Pos       | Pos       | Pos       | Neg      | Neg                  | Pos       | Neg      | Neg       | Pos                    |
| SRA-PF4 (Pos/Neg)                                | Pos       | Pos       | Pos       | Neg      | Pos                  | Pos       | Neg      | Pos       | Pos                    |
| <b>Diagnosis of VITT</b>                         | Confirmed | Confirmed | Confirmed | Unlikely | Confirmed            | Confirmed | Unlikely | Confirmed | Confirmed              |

**CVT** : cerebral vein thrombosis ; **Splanchnic VT** : splanchnic vein thrombosis ; **PVS/PF4** : Polyvinylsulfonate platelet factor 4 ; **SRA** : serotonin release assay ; **F** : female ; **M** : Male ; **DVT** : deep vein thrombosis ; **PE** : pulmonary embolism ; **Neg** : negative ; **Pos** : positive ; **ND** : not done ; **VITT** : Vaccine Induced Thrombotic Thrombocytopenia
